# Supplementary material for: Integrative Genomic Analysis Predicts Causative Cis -Regulatory Mechanisms of the Breast Cancer–Associated Genetic Variant rs4415084
Source: Oxford University Press journal article supplement (doi:10.1158/0008-5472.can-17-3486), 2018-01-19
Supplement: 00085472can173486-sup-192161_2_supp_4485077_p20fbw.xlsx [file 00085472can173486-sup-192161_2_supp_4485077_p20fbw.xlsx]

## Sheet: Datasets
Supplementary Table 7. Differential chromatin interaction analysis between MCF-7 and T-47D based on Hi-C data
Datasets	dataset source	cell line	Replicates	Number of reads	# of pairs at 40k
T47D_ENCODE_s1	ENCLB758KFU	T47D	replicate 1	117354835	16463760
T47D_ENCODE_s2	ENCLB183QHG	T47D	replicate 2	130347693	17911466
T47D_GSE53463_HindIII_s1	GSM1294038	T47D	replicate 1	86143671	8136555
T47D_GSE53463_HindIII_s2	GSM1294039	T47D	replicate 1	88989132	6838446
T47D_GSE53463_NcoI_s1	GSM1294040	T47D	replicate 1	171303148	19033603
T47D_GSE53463_NcoI_s2	GSM1294041	T47D	replicate 1	189531795	19958848
MCF7_GSE66733	GSM1631185	MCF7	replicate 1	286286296	12387841
MCF7_GSE51687_0h_s1	GSM1250485 and GSM1250486	MCF7	replicate 1	56369553	37012
MCF7_GSE51687_0h_s2	GSM1250487 and GSM1250488	MCF7	replicate 2	68345488	38616
MCF7_GSE51687_0.5h_s1	GSM1250489 and GSM1250490	MCF7	replicate 1	61929371	51771
MCF7_GSE51687_0.5h_s2	GSM1250491 and GSM1250492	MCF7	replicate 2	71901857	54018
MCF7_GSE51687_1h_s1	GSM1250493 and GSM1250494	MCF7	replicate 1	45604757	74286
MCF7_GSE51687_1h_s2	GSM1250495 and GSM1250496	MCF7	replicate 2	66117876	79503
MCF7_GSE51687_4h_s1	GSM1250497 and GSM1250498	MCF7	replicate 1	58458878	98577
MCF7_GSE51687_4h_s2	GSM1250499 and GSM1250500	MCF7	replicate 2	60468291	98631
MCF7_GSE51687_24h_s1	GSM1250501 and GSM1250502	MCF7	replicate 1	41275502	18186
MCF7_GSE51687_24h_s2	GSM1250503 and GSM1250504	MCF7	replicate 2	54324005	19838
Table: Sample information and read/pair statistics for T47D and MCF7 datasets

## Sheet: Raw Counts
Datasets	SNP-lncRNA RP11-53O19.1	SNP-lncRNA RP11-53O19.1	SNP-MRPS30 gene
Pairs of interest	chr5_44640000_44680000-chr5_44720000_44760000	chr5_44640000_44680000-chr5_44760000_44800000	chr5_44640000_44680000-chr5_44800000_44840000
T47D_ENCODE_s1	25	10	14
T47D_ENCODE_s2	18	15	12
T47D_GSE53463_HindIII_s1	10	6	6
T47D_GSE53463_HindIII_s2	7	11	4
T47D_GSE53463_NcoI_s1	31	48	28
T47D_GSE53463_NcoI_s2	40	35	20
MCF7_GSE66733	5	4	9
MCF7_GSE51687_0h_s1	0	0	0
MCF7_GSE51687_0h_s2	0	0	0
MCF7_GSE51687_0.5h_s1	0	0	0
MCF7_GSE51687_0.5h_s2	0	0	0
MCF7_GSE51687_1h_s1	0	0	0
MCF7_GSE51687_1h_s2	0	0	0
MCF7_GSE51687_4h_s1	0	0	0
MCF7_GSE51687_4h_s2	0	0	0
MCF7_GSE51687_24h_s1	0	0	0
MCF7_GSE51687_24h_s2	0	0	0
Table: Raw counts obtained from running HiC-Pro for interactions with the lncRNA RP11-53O19.1 and MRPS30 gene in T47D and MCF7 datasets

## Sheet: IcedNorm
Datasets	SNP-lncRNA RP11-53O19.1	SNP-lncRNA RP11-53O19.1	SNP-MRPS30 gene	Total Counts at 40kb
Pairs of interest	chr5_44640000_44680000-chr5_44720000_44760000	chr5_44640000_44680000-chr5_44760000_44800000	chr5_44640000_44680000-chr5_44800000_44840000
T47D_ENCODE_s1	24.2871	6.7867	10.7496	35052690
T47D_ENCODE_s2	15.316	9.89936	9.1125	38205047
T47D_GSE53463_HindIII_s1	5.91431	2.79305	2.75196	14541626
T47D_GSE53463_HindIII_s2	4.27567	5.61763	2.13809	12952562
T47D_GSE53463_NcoI_s1	22.0597	27.6882	17.8999	52055586
T47D_GSE53463_NcoI_s2	25.8047	18.4811	11.6076	54509173
MCF7_GSE66733	3.30947	2.32653	4.97034	21534914
MCF7_GSE51687_0h_s1	0	0	0	62168
MCF7_GSE51687_0h_s2	0	0	0	70039
MCF7_GSE51687_0.5h_s1	0	0	0	96227
MCF7_GSE51687_0.5h_s2	0	0	0	102408
MCF7_GSE51687_1h_s1	0	0	0	141276
MCF7_GSE51687_1h_s2	0	0	0	155103
MCF7_GSE51687_4h_s1	0	0	0	196301
MCF7_GSE51687_4h_s2	0	0	0	182896
MCF7_GSE51687_24h_s1	0	0	0	33144
MCF7_GSE51687_24h_s2	0	0	0	35861
Table: ICE nomalized counts obtained from running HiC-Pro and ICE normalization for interactions with the lncRNA RP11-53O19.1 and MRPS30 gene in T47D and MCF7 datasets

## Sheet: DepthNorm
Datasets	SNP-lncRNA RP11-53O19.1	SNP-lncRNA RP11-53O19.1	SNP-MRPS30 gene
Pairs of interest	chr5_44640000_44680000-chr5_44720000_44760000	chr5_44640000_44680000-chr5_44760000_44800000	chr5_44640000_44680000-chr5_44800000_44840000
T47D_ENCODE_s1	9.3712	2.61866	4.14773
T47D_ENCODE_s2	5.42208	3.50451	3.22595
T47D_GSE53463_HindIII_s1	5.50088	2.59781	2.55959
T47D_GSE53463_HindIII_s2	4.46468	5.86595	2.2326
T47D_GSE53463_NcoI_s1	5.73156	7.19398	4.65077
T47D_GSE53463_NcoI_s2	6.4028	4.58563	2.88014
MCF7_GSE66733	2.07853	1.46119	3.12165
MCF7_GSE51687_0h_s1	0	0	0
MCF7_GSE51687_0h_s2	0	0	0
MCF7_GSE51687_0.5h_s1	0	0	0
MCF7_GSE51687_0.5h_s2	0	0	0
MCF7_GSE51687_1h_s1	0	0	0
MCF7_GSE51687_1h_s2	0	0	0
MCF7_GSE51687_4h_s1	0	0	0
MCF7_GSE51687_4h_s2	0	0	0
MCF7_GSE51687_24h_s1	0	0	0
MCF7_GSE51687_24h_s2	0	0	0
Table: ICE nomalized counts with additional sequencing depth normalization for interactions with the lncRNA RP11-53O19.1 and MRPS30 gene in T47D and MCF7 datasets

## Sheet: edgeR_global
Candidate interactions	Pairs of interest	logFC	logCPM	LR	PValue	FDR	distance
SNP-lncRNA RP11-53O19.1	chr5_44640000_44680000-chr5_44720000_44760000	2.86161	11.0478	24.3183	8.16575e-07	8.33247e-06	80000
SNP-lncRNA RP11-53O19.1	chr5_44640000_44680000-chr5_44760000_44800000	3.08594	11.4105	22.4111	2.20097e-06	1.24147e-05	120000
SNP-MRPS30 gene	chr5_44640000_44680000-chr5_44800000_44840000	1.70116	11.2901	8.01352	0.00464295	0.0073388	160000
Table: We normalized the data using trimmed mean of M values (TMM) normalization and applied edgeR on the pairs at 80k, 120k and 160k, treating all T47D datasets as replicates of the treatment and all MCF7 datasets as replicates of the control.

## Sheet: T47DvsMCF7_GSE66733
Pair-wise comparisons	Candidate interactions	Pairs of interest	logFC	logCPM	LR	PValue	FDR	distance
T47D_ENCODE vs MCF7_GSE66733	SNP-lncRNA RP11-53O19.1	chr5_44640000_44680000-chr5_44720000_44760000	1.26027	8.06725	2.96311	0.0851839	0.391064	80000
T47D_GSE53463_HindIII vs MCF7_GSE66733	SNP-lncRNA RP11-53O19.1	chr5_44640000_44680000-chr5_44760000_44800000	0.948902	7.94227	1.27479	0.258869	0.772196	80000
T47D_GSE53463_NcoI vs MCF7_GSE66733	SNP-MRPS30 gene	chr5_44640000_44680000-chr5_44800000_44840000	0.847539	7.6975	1.04947	0.30563	0.648723	80000
T47D_ENCODE vs MCF7_GSE66733	SNP-lncRNA RP11-53O19.1	chr5_44640000_44680000-chr5_44720000_44760000	0.517861	7.43811	0.289785	0.590358	0.859806	120000
T47D_GSE53463_HindIII vs MCF7_GSE66733	SNP-lncRNA RP11-53O19.1	chr5_44640000_44680000-chr5_44760000_44800000	1.17761	8.06475	1.48278	0.22334	0.767045	120000
T47D_GSE53463_NcoI vs MCF7_GSE66733	SNP-MRPS30 gene	chr5_44640000_44680000-chr5_44800000_44840000	1.30289	7.93874	2.00194	0.157098	0.510947	120000
T47D_ENCODE vs MCF7_GSE66733	SNP-lncRNA RP11-53O19.1	chr5_44640000_44680000-chr5_44720000_44760000	-0.372859	7.97514	0.258783	0.610957	0.870446	160000
T47D_GSE53463_HindIII vs MCF7_GSE66733	SNP-lncRNA RP11-53O19.1	chr5_44640000_44680000-chr5_44760000_44800000	-0.679935	8.20005	0.565966	0.451866	0.900222	160000
T47D_GSE53463_NcoI vs MCF7_GSE66733	SNP-MRPS30 gene	chr5_44640000_44680000-chr5_44800000_44840000	-0.457584	7.81874	0.336953	0.561593	0.847804	160000
Table: We normalized the data using trimmed mean of M values (TMM) normalization and applied edgeR on the pairs at 80k, 120k and 160k. We did pairwise comparison: comparing every two replicates of T47D datasets as the treatment with MCF7 dataset GSE66733 as the control.

## Sheet: T47DvsMCF7_GSE51687_0h
Pair-wise comparisons	Candidate interactions	Pairs of interest	logFC	logCPM	LR	PValue	FDR	distance
T47D_ENCODE vs MCF7_GSE51687_0h	SNP-lncRNA RP11-53O19.1	chr5_44640000_44680000-chr5_44720000_44760000	6.45674	11.2108	7.11653	0.00763766	0.0375746	80000
T47D_GSE53463_HindIII vs MCF7_GSE51687_0h	SNP-lncRNA RP11-53O19.1	chr5_44640000_44680000-chr5_44760000_44800000	4.80515	11.2538	5.69957	0.0169691	0.0422175	80000
T47D_GSE53463_NcoI vs MCF7_GSE51687_0h	SNP-MRPS30 gene	chr5_44640000_44680000-chr5_44800000_44840000	6.67752	10.8082	5.34109	0.0208284	0.0386413	80000
T47D_ENCODE vs MCF7_GSE51687_0h	SNP-lncRNA RP11-53O19.1	chr5_44640000_44680000-chr5_44720000_44760000	5.25997	10.8747	3.68911	0.0547688	0.063148	120000
T47D_GSE53463_HindIII vs MCF7_GSE51687_0h	SNP-lncRNA RP11-53O19.1	chr5_44640000_44680000-chr5_44760000_44800000	4.62956	11.6714	5.69481	0.0170151	0.0431487	120000
T47D_GSE53463_NcoI vs MCF7_GSE51687_0h	SNP-MRPS30 gene	chr5_44640000_44680000-chr5_44800000_44840000	6.64562	11.3407	6.10954	0.0134454	0.0405724	120000
T47D_ENCODE vs MCF7_GSE51687_0h	SNP-lncRNA RP11-53O19.1	chr5_44640000_44680000-chr5_44720000_44760000	5.55392	11.4919	5.8079	0.0159543	0.0272144	160000
T47D_GSE53463_HindIII vs MCF7_GSE51687_0h	SNP-lncRNA RP11-53O19.1	chr5_44640000_44680000-chr5_44760000_44800000	3.95958	11.6721	3.8734	0.0490571	0.0742887	160000
T47D_GSE53463_NcoI vs MCF7_GSE51687_0h	SNP-MRPS30 gene	chr5_44640000_44680000-chr5_44800000_44840000	6.06072	11.4011	6.03445	0.0140294	0.0224746	160000
Table: We normalized the data using trimmed mean of M values (TMM) normalization and applied edgeR on the pairs at 80k, 120k and 160k. We did pairwise comparison: comparing every two replicates of T47D datasets as the treatment with MCF7 dataset GSE51687_0h as the control.

## Sheet: T47DvsMCF7_GSE51687_0.5h
Pair-wise comparisons	Candidate interactions	Pairs of interest	logFC	logCPM	LR	PValue	FDR	distance
T47D_ENCODE vs MCF7_GSE51687_0.5h	SNP-lncRNA RP11-53O19.1	chr5_44640000_44680000-chr5_44720000_44760000	6.48402	10.9056	8.56491	0.00342705	0.0185076	80000
T47D_GSE53463_HindIII vs MCF7_GSE51687_0.5h	SNP-lncRNA RP11-53O19.1	chr5_44640000_44680000-chr5_44760000_44800000	4.86049	10.8898	6.50915	0.0107321	0.0270728	80000
T47D_GSE53463_NcoI vs MCF7_GSE51687_0.5h	SNP-MRPS30 gene	chr5_44640000_44680000-chr5_44800000_44840000	6.70029	10.539	6.77301	0.00925464	0.0174153	80000
T47D_ENCODE vs MCF7_GSE51687_0.5h	SNP-lncRNA RP11-53O19.1	chr5_44640000_44680000-chr5_44720000_44760000	5.31139	10.3592	4.88242	0.0271316	0.0314555	120000
T47D_GSE53463_HindIII vs MCF7_GSE51687_0.5h	SNP-lncRNA RP11-53O19.1	chr5_44640000_44680000-chr5_44760000_44800000	4.93616	11.1374	9.33334	0.00225022	0.00578553	120000
T47D_GSE53463_NcoI vs MCF7_GSE51687_0.5h	SNP-MRPS30 gene	chr5_44640000_44680000-chr5_44800000_44840000	6.70302	10.9254	9.42011	0.00214619	0.00649495	120000
T47D_ENCODE vs MCF7_GSE51687_0.5h	SNP-lncRNA RP11-53O19.1	chr5_44640000_44680000-chr5_44720000_44760000	5.56892	10.8974	6.23005	0.01256	0.0215703	160000
T47D_GSE53463_HindIII vs MCF7_GSE51687_0.5h	SNP-lncRNA RP11-53O19.1	chr5_44640000_44680000-chr5_44760000_44800000	4.02137	11.0869	4.32215	0.0376193	0.0572455	160000
T47D_GSE53463_NcoI vs MCF7_GSE51687_0.5h	SNP-MRPS30 gene	chr5_44640000_44680000-chr5_44800000_44840000	6.05209	10.7436	5.71496	0.016821	0.0272248	160000
Table: We normalized the data using trimmed mean of M values (TMM) normalization and applied edgeR on the pairs at 80k, 120k and 160k. We did pairwise comparison: comparing every two replicates of T47D datasets as the treatment with MCF7 dataset GSE51687_0.5h as the control.

## Sheet: T47DvsMCF7_GSE51687_1h
Pair-wise comparisons	Candidate interactions	Pairs of interest	logFC	logCPM	LR	PValue	FDR	distance
T47D_ENCODE vs MCF7_GSE51687_1h	SNP-lncRNA RP11-53O19.1	chr5_44640000_44680000-chr5_44720000_44760000	6.46687	10.5234	7.67682	0.00559346	0.0291786	80000
T47D_GSE53463_HindIII vs MCF7_GSE51687_1h	SNP-lncRNA RP11-53O19.1	chr5_44640000_44680000-chr5_44760000_44800000	4.81065	10.5271	5.77986	0.0162108	0.0409272	80000
T47D_GSE53463_NcoI vs MCF7_GSE51687_1h	SNP-MRPS30 gene	chr5_44640000_44680000-chr5_44800000_44840000	6.68039	10.0941	5.52393	0.018758	0.0354006	80000
T47D_ENCODE vs MCF7_GSE51687_1h	SNP-lncRNA RP11-53O19.1	chr5_44640000_44680000-chr5_44720000_44760000	5.24863	10.0749	3.42082	0.0643789	0.0748428	120000
T47D_GSE53463_HindIII vs MCF7_GSE51687_1h	SNP-lncRNA RP11-53O19.1	chr5_44640000_44680000-chr5_44760000_44800000	4.59906	10.8887	5.33008	0.0209604	0.0536176	120000
T47D_GSE53463_NcoI vs MCF7_GSE51687_1h	SNP-MRPS30 gene	chr5_44640000_44680000-chr5_44800000_44840000	6.65023	10.6088	6.38298	0.011522	0.0353601	120000
T47D_ENCODE vs MCF7_GSE51687_1h	SNP-lncRNA RP11-53O19.1	chr5_44640000_44680000-chr5_44720000_44760000	5.52289	10.493	4.93482	0.0263208	0.0454011	160000
T47D_GSE53463_HindIII vs MCF7_GSE51687_1h	SNP-lncRNA RP11-53O19.1	chr5_44640000_44680000-chr5_44760000_44800000	3.93148	10.76	3.67467	0.0552451	0.0846148	160000
T47D_GSE53463_NcoI vs MCF7_GSE51687_1h	SNP-MRPS30 gene	chr5_44640000_44680000-chr5_44800000_44840000	6.03133	10.3741	4.89765	0.0268933	0.0437306	160000
Table: We normalized the data using trimmed mean of M values (TMM) normalization and applied edgeR on the pairs at 80k, 120k and 160k. We did pairwise comparison: comparing every two replicates of T47D datasets as the treatment with MCF7 dataset GSE51687_1h as the control.

## Sheet: T47DvsMCF7_GSE51687_4h
Pair-wise comparisons	Candidate interactions	Pairs of interest	logFC	logCPM	LR	PValue	FDR	distance
T47D_ENCODE vs MCF7_GSE51687_4h	SNP-lncRNA RP11-53O19.1	chr5_44640000_44680000-chr5_44720000_44760000	6.48082	10.2525	8.434	0.00368269	0.0202585	80000
T47D_GSE53463_HindIII vs MCF7_GSE51687_4h	SNP-lncRNA RP11-53O19.1	chr5_44640000_44680000-chr5_44760000_44800000	4.85811	10.2492	6.47481	0.0109414	0.0281241	80000
T47D_GSE53463_NcoI vs MCF7_GSE51687_4h	SNP-MRPS30 gene	chr5_44640000_44680000-chr5_44800000_44840000	6.68459	9.80048	5.78882	0.0161284	0.030868	80000
T47D_ENCODE vs MCF7_GSE51687_4h	SNP-lncRNA RP11-53O19.1	chr5_44640000_44680000-chr5_44720000_44760000	5.28023	9.98432	4.15133	0.0416019	0.0488225	120000
T47D_GSE53463_HindIII vs MCF7_GSE51687_4h	SNP-lncRNA RP11-53O19.1	chr5_44640000_44680000-chr5_44760000_44800000	4.64357	10.7211	5.88663	0.0152563	0.0395259	120000
T47D_GSE53463_NcoI vs MCF7_GSE51687_4h	SNP-MRPS30 gene	chr5_44640000_44680000-chr5_44800000_44840000	6.66439	10.4799	7.21681	0.00722238	0.0222418	120000
T47D_ENCODE vs MCF7_GSE51687_4h	SNP-lncRNA RP11-53O19.1	chr5_44640000_44680000-chr5_44720000_44760000	5.5223	10.3726	4.91827	0.0265741	0.0464023	160000
T47D_GSE53463_HindIII vs MCF7_GSE51687_4h	SNP-lncRNA RP11-53O19.1	chr5_44640000_44680000-chr5_44760000_44800000	3.91081	10.6272	3.52382	0.060493	0.0935059	160000
T47D_GSE53463_NcoI vs MCF7_GSE51687_4h	SNP-MRPS30 gene	chr5_44640000_44680000-chr5_44800000_44840000	6.02264	10.2104	4.57748	0.0323948	0.0531163	160000
Table: We normalized the data using trimmed mean of M values (TMM) normalization and applied edgeR on the pairs at 80k, 120k and 160k. We did pairwise comparison: comparing every two replicates of T47D datasets as the treatment with MCF7 dataset GSE51687_4h as the control.

[truncated: 1 more sheets: T47DvsMCF7_GSE51687_24h]
